# Supplementary material for: The Effect of Monophasic Pulsed Current with Stretching Exercise on the Heel Pain and Plantar Fascia Thickness in Plantar Fasciitis: A Randomized Controlled Trial
Source: PubMed Central journal article supplement (PMC7349871; doi:10.3390/healthcare8020079), 2020-03-30
Supplement: healthcare-08-00079-s001.pdf [file healthcare-08-00079-s001.pdf]

### Supplementary Materials

- The patient will be instructed to cross the affected leg over the sound leg while seated, and using his/her hand, applying metatarso-phalangeal joint dorsiflexion (pulling the toes back toward the shin until the patient feels a stretch in the arch of the foot).
- Hold each stretch for a count of 10 (or 10 seconds), and repeating 10 times (DONOT OVER STRETCH).
- All patients will be asked to perform the stretching program three times per day.
- Keep a daily log of stretching exercise for 4 weeks.
- The first stretch will be done before taking the first step in the morning.

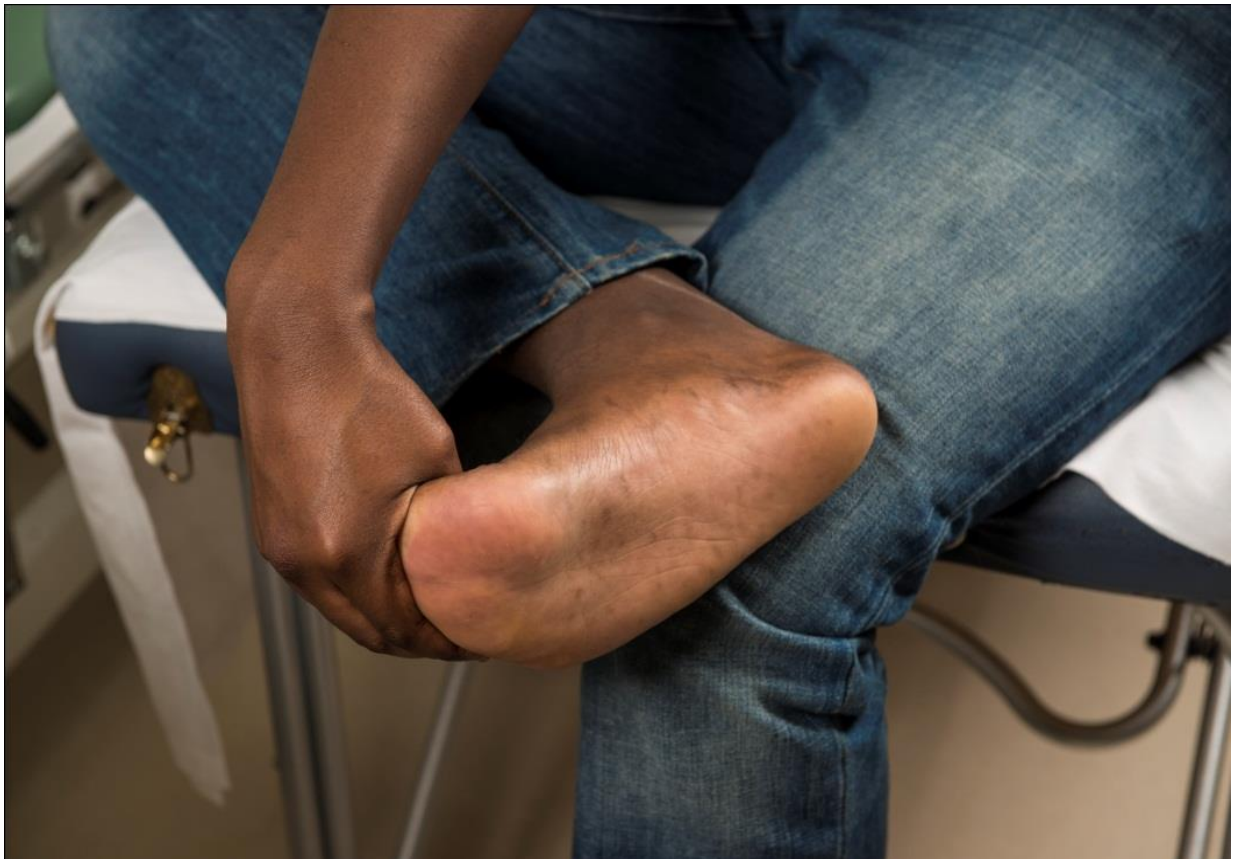

**Figure S1.** Home based plantar fascia stretching exercises.

**Table S1.** Home based plantar fascia stretching exercises log. Plantar Fascia stretching exercises log.

Name: -----

| Day    | Monday | Tuesday | Wednesday | Thursday | Friday | Saturday | Sunday |
|--------|--------|---------|-----------|----------|--------|----------|--------|
| Week 1 |        |         |           |          |        |          |        |
| Week 2 |        |         |           |          |        |          |        |
| Week 3 |        |         |           |          |        |          |        |
| Week 4 |        |         |           |          |        |          |        |
